# Supplementary material for: Solvothermal Synthesis of Calcium Hydroxyapatite via Hydrolysis of Alpha-Tricalcium Phosphate in the Presence of Different Organic Additives
Source: MDPI journal article supplement (doi:10.3390/cryst13020265), 2023-02-03
Supplement: s1 [file s1]

# **Solvothermal Synthesis of Calcium Hydroxyapatite *via* Hydrolysis of alpha-Tricalcium Phosphate in the Presence of Different Organic Additives**

**Rasa Karalkeviciene <sup>1</sup>, Eva Raudonyte-Svirbutaviciene <sup>1</sup>, Aleksej Zarkov <sup>1,\*</sup>, Jen-Chang Yang <sup>2</sup>, Anatoli I. Popov <sup>3</sup>, Aivaras Kareiva <sup>1</sup>**

<sup>1</sup> Institute of Chemistry, Faculty of Chemistry and Geosciences, Vilnius University, Naugarduko 24, LT-03225 Vilnius, Lithuania

<sup>2</sup> Graduate Institute of Nanomedicine and Medical Engineering, College of Biomedical Engineering, Taipei Medical University, 250 Wu-Hsing St, Taipei 11052, Taiwan

<sup>3</sup> Institute of Solid State Physics, University of Latvia, Kengaraga 8, LV-1063 Riga, Latvia

\* Correspondence: [aleksej.zarkov@chf.vu.lt](mailto:aleksej.zarkov@chf.vu.lt);

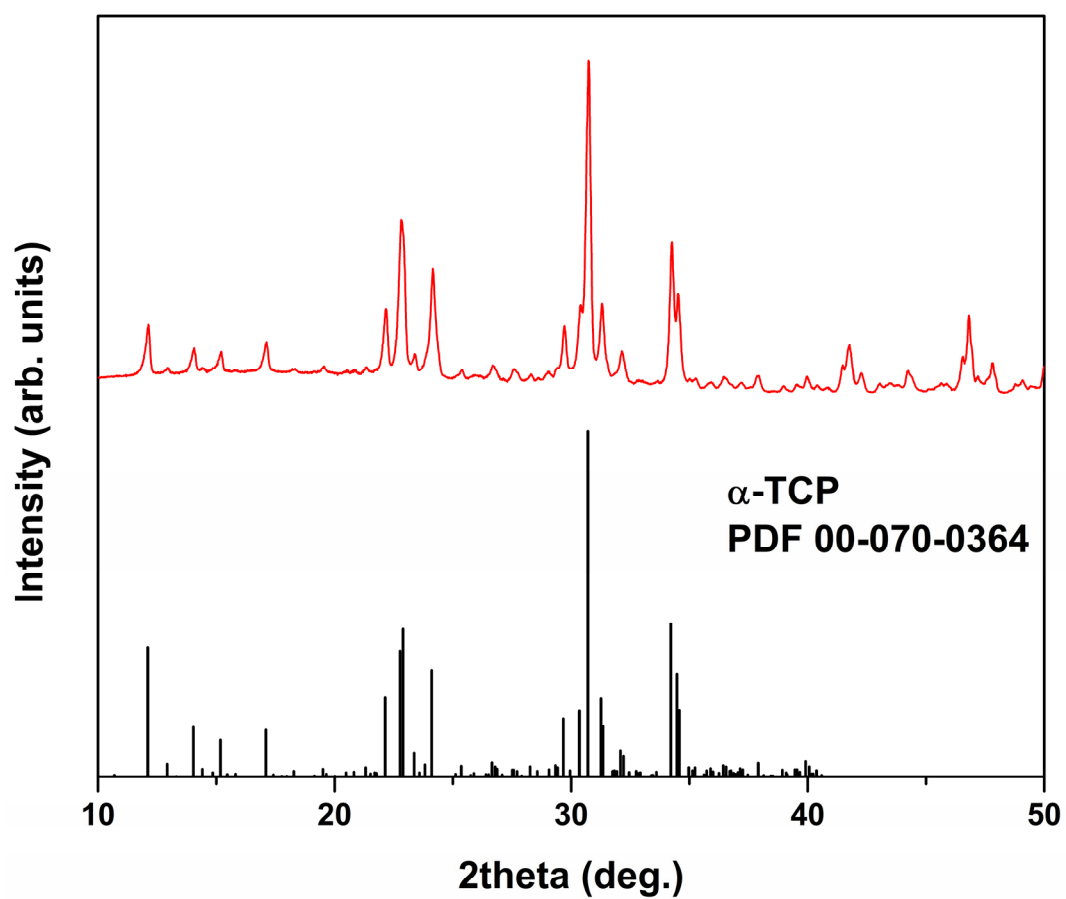

Figure S1. XRD pattern of  $\alpha$ -TCP used for the synthesis of CDHA.

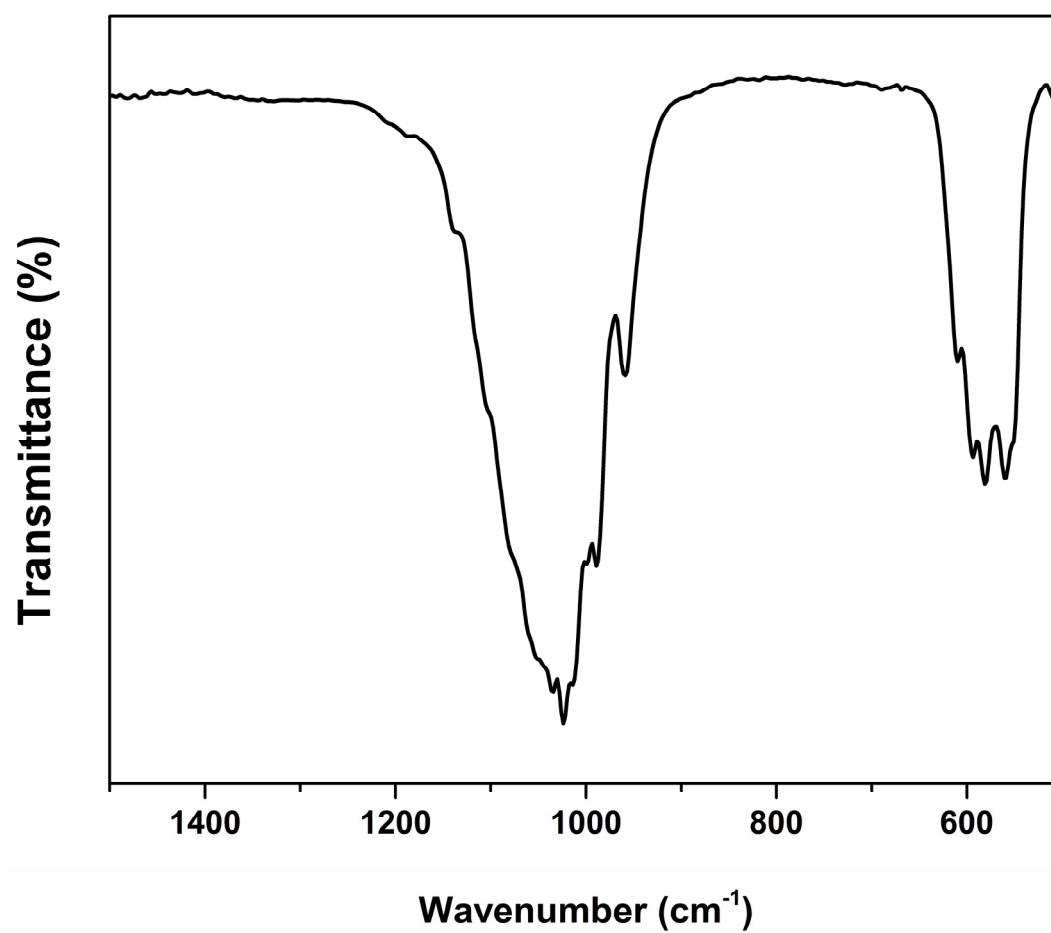

Figure S2. FTIR spectrum of  $\alpha$ -TCP used for the synthesis of CDHA.

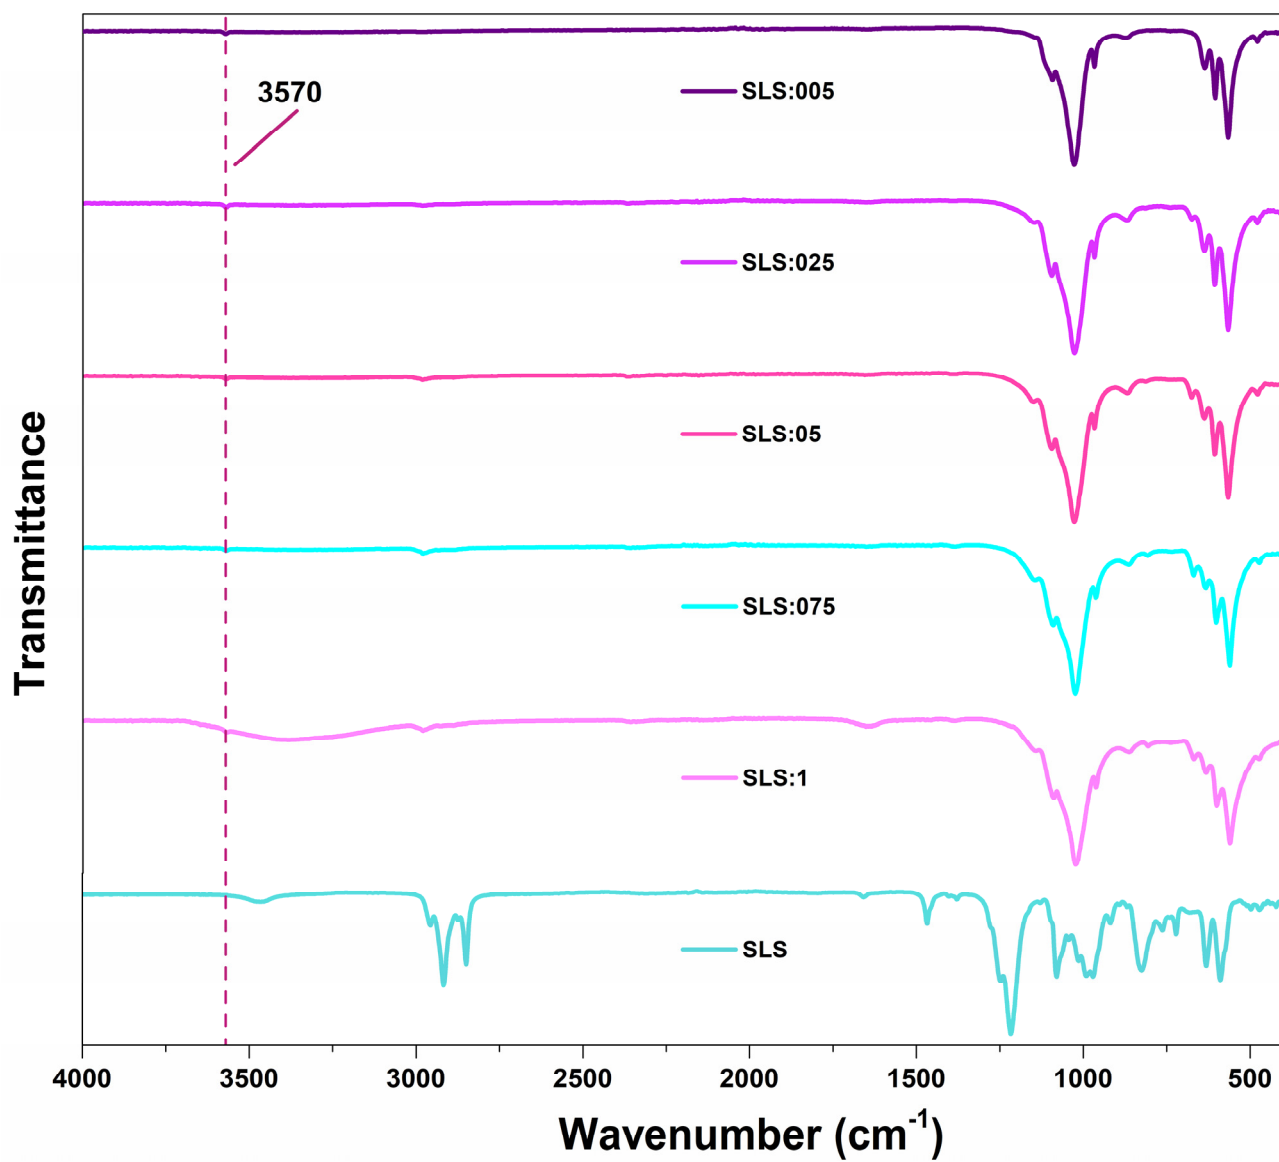

Figure S3. FTIR spectra of the samples prepared using various concentrations of SLS and FTIR spectrum of pristine SLS.

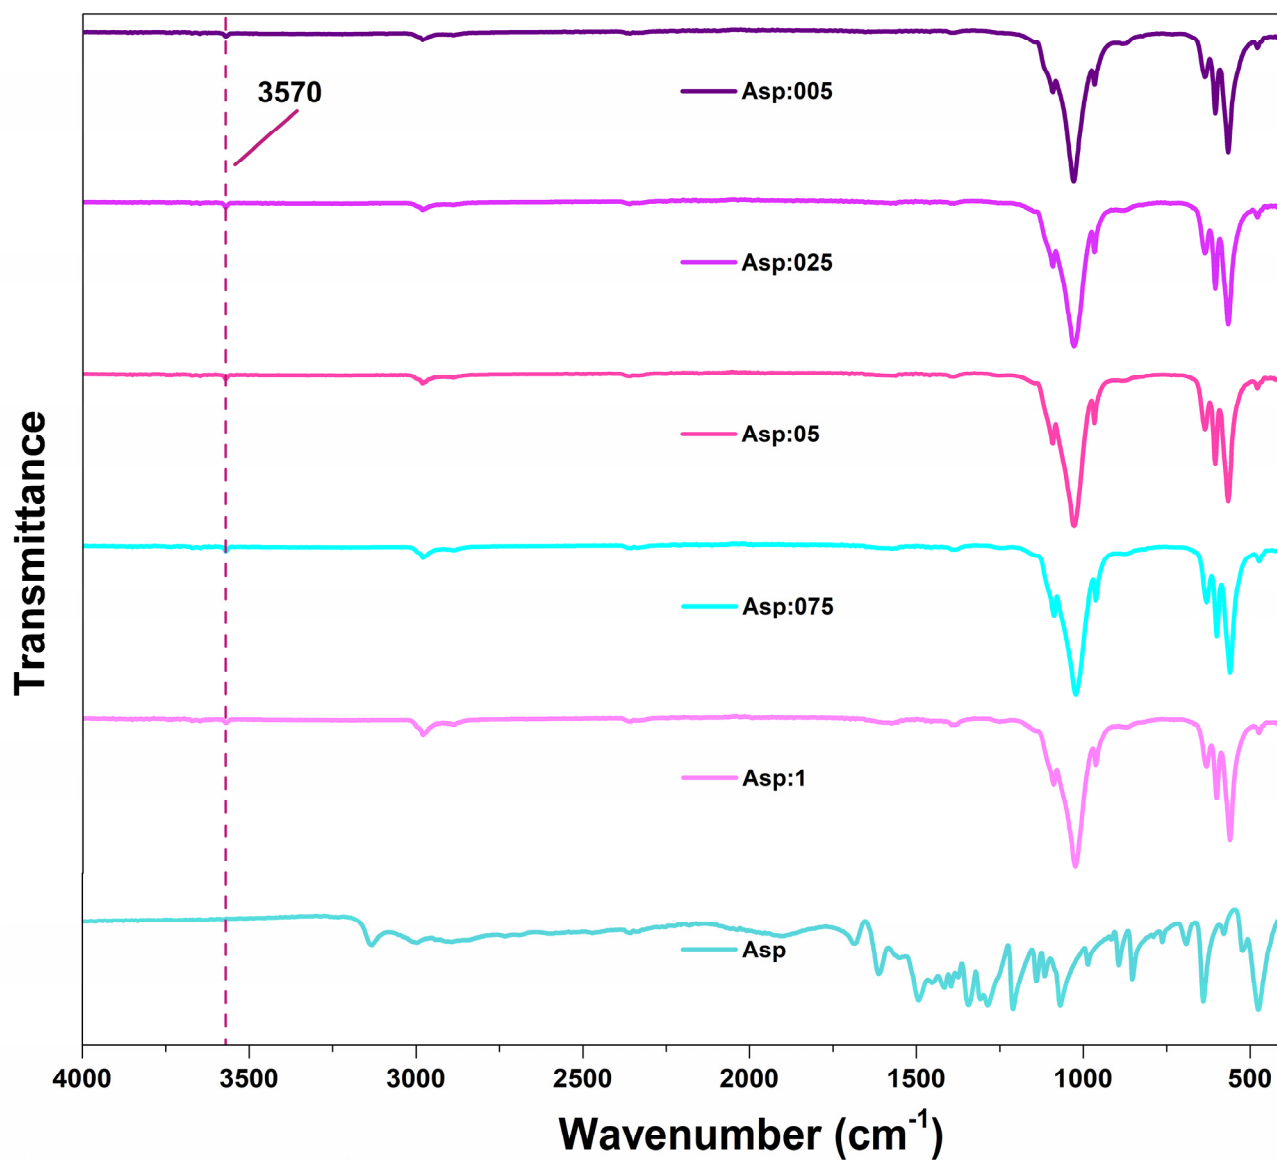

Figure S4. FTIR spectra of the samples prepared using various concentrations of aspartic acid and FTIR spectrum of pristine aspartic acid.

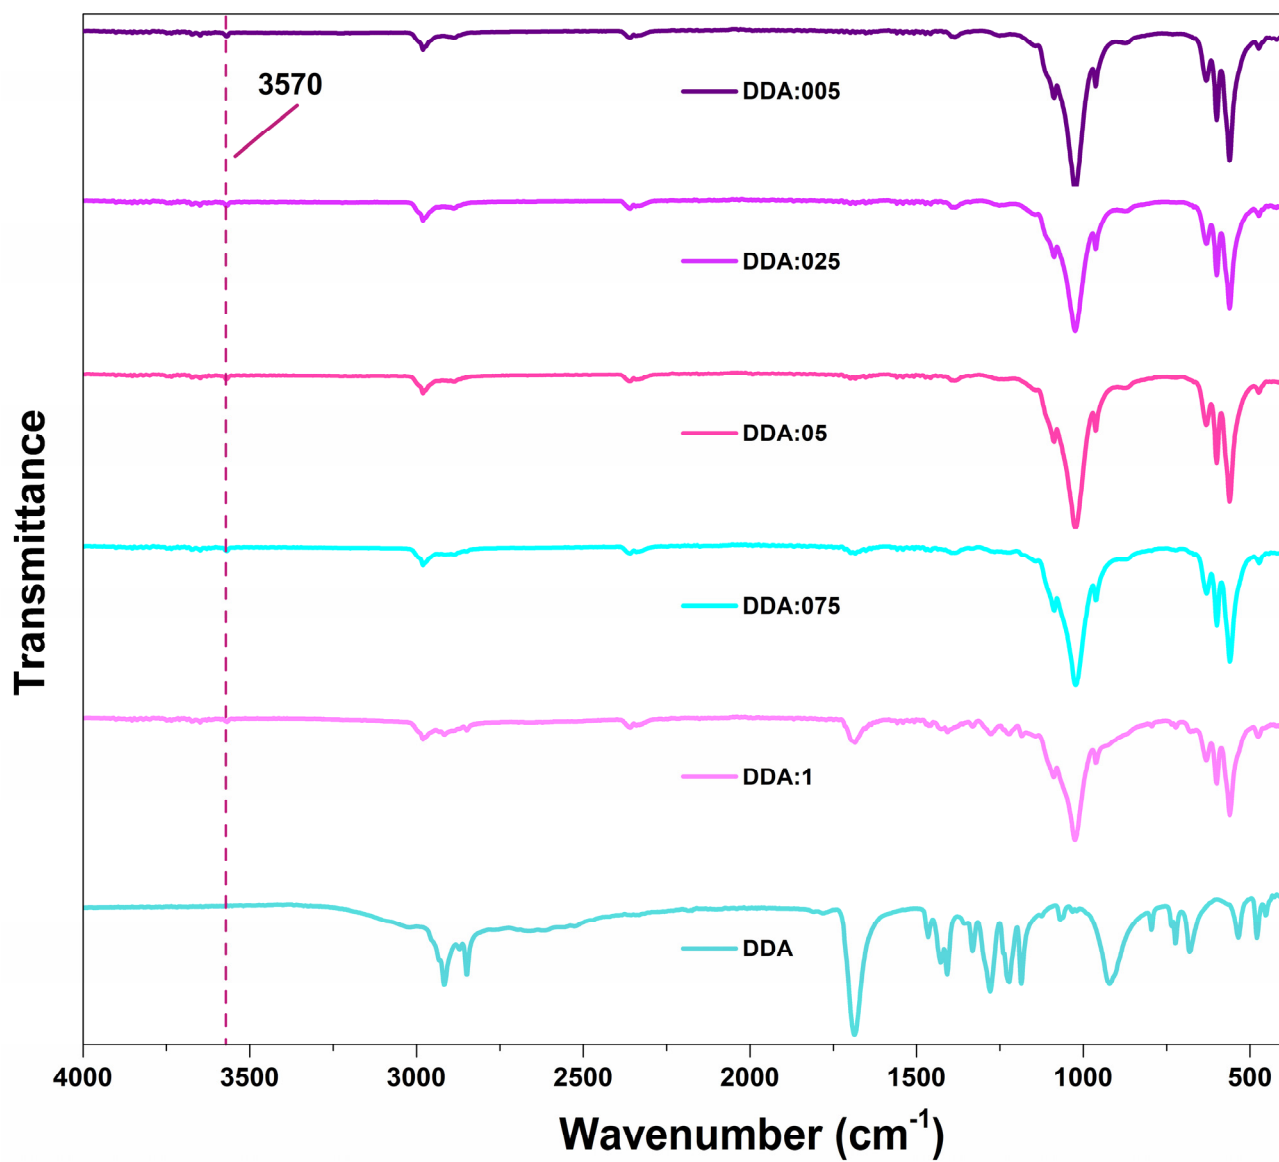

Figure S5. FTIR spectra of the samples prepared using various concentrations of dodecanedioic acid and FTIR spectrum of pristine dodecanedioic acid.

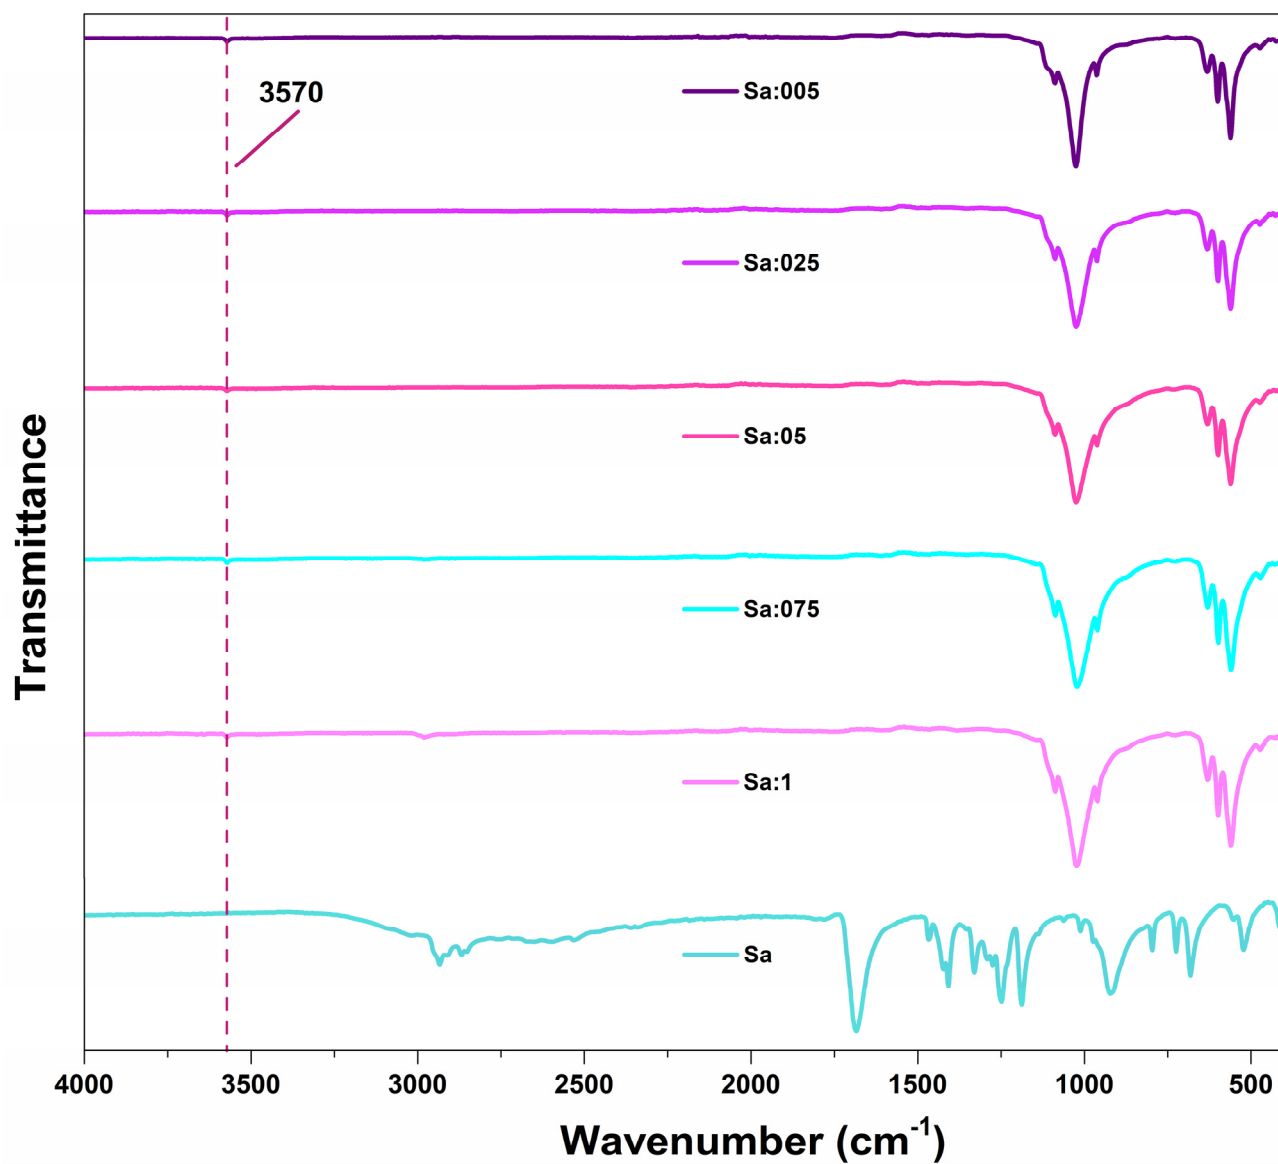

Figure S6. FTIR spectra of the samples prepared using various concentrations of suberic acid and FTIR spectrum of pristine suberic acid.

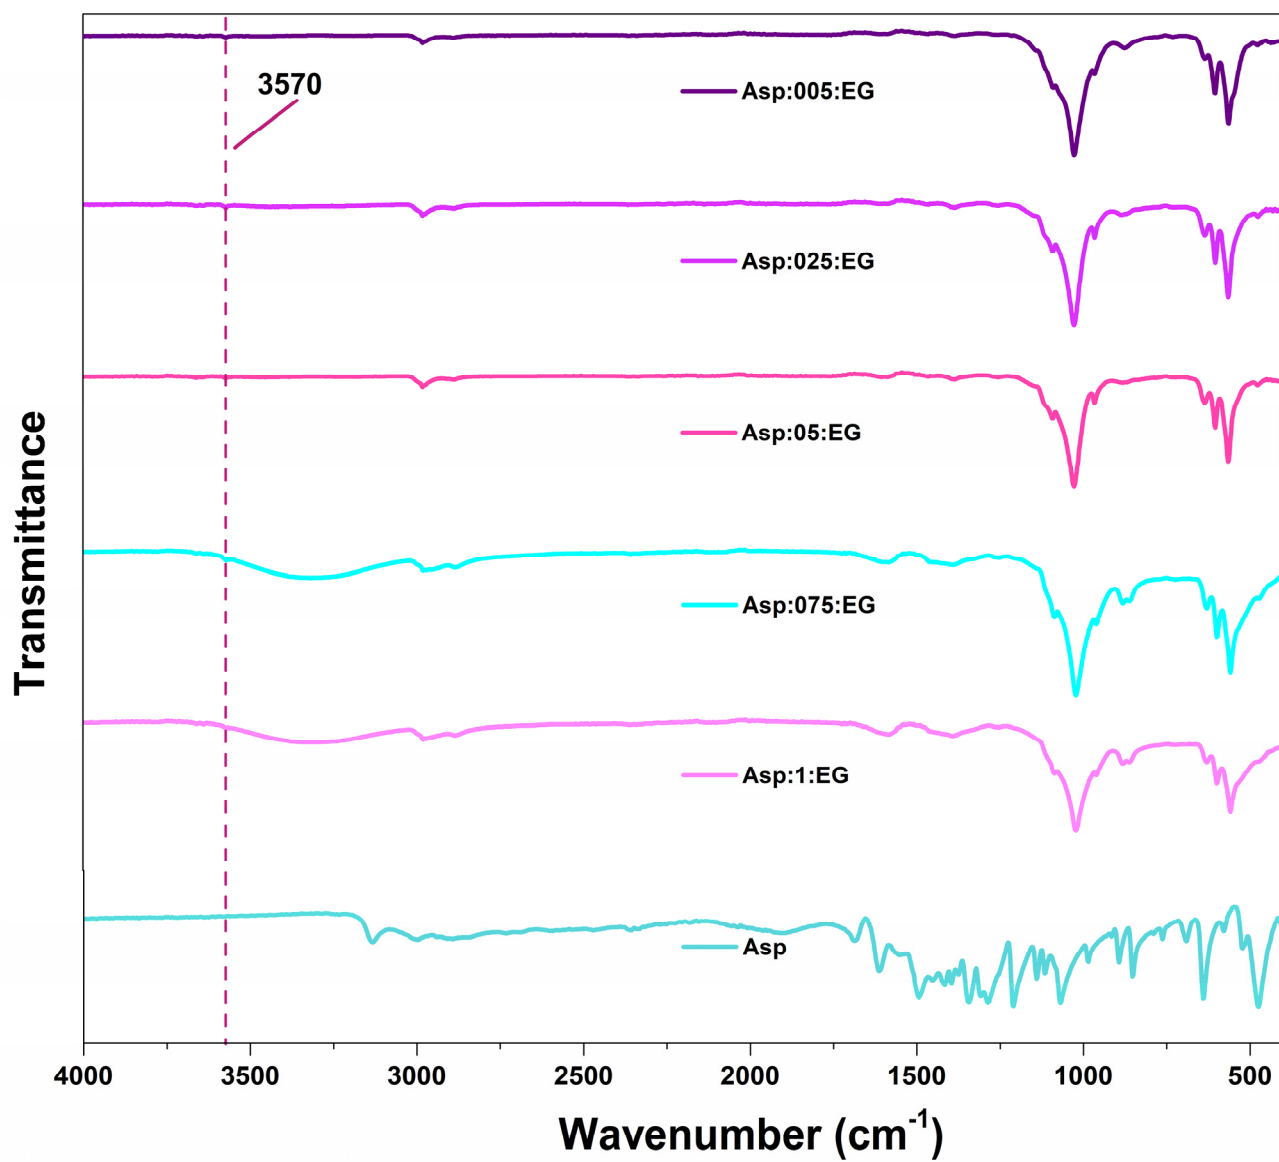

Figure S7. FTIR spectra of the samples prepared using various concentrations of aspartic acid in water-ethylene glycol mixture (40:60, v/v).



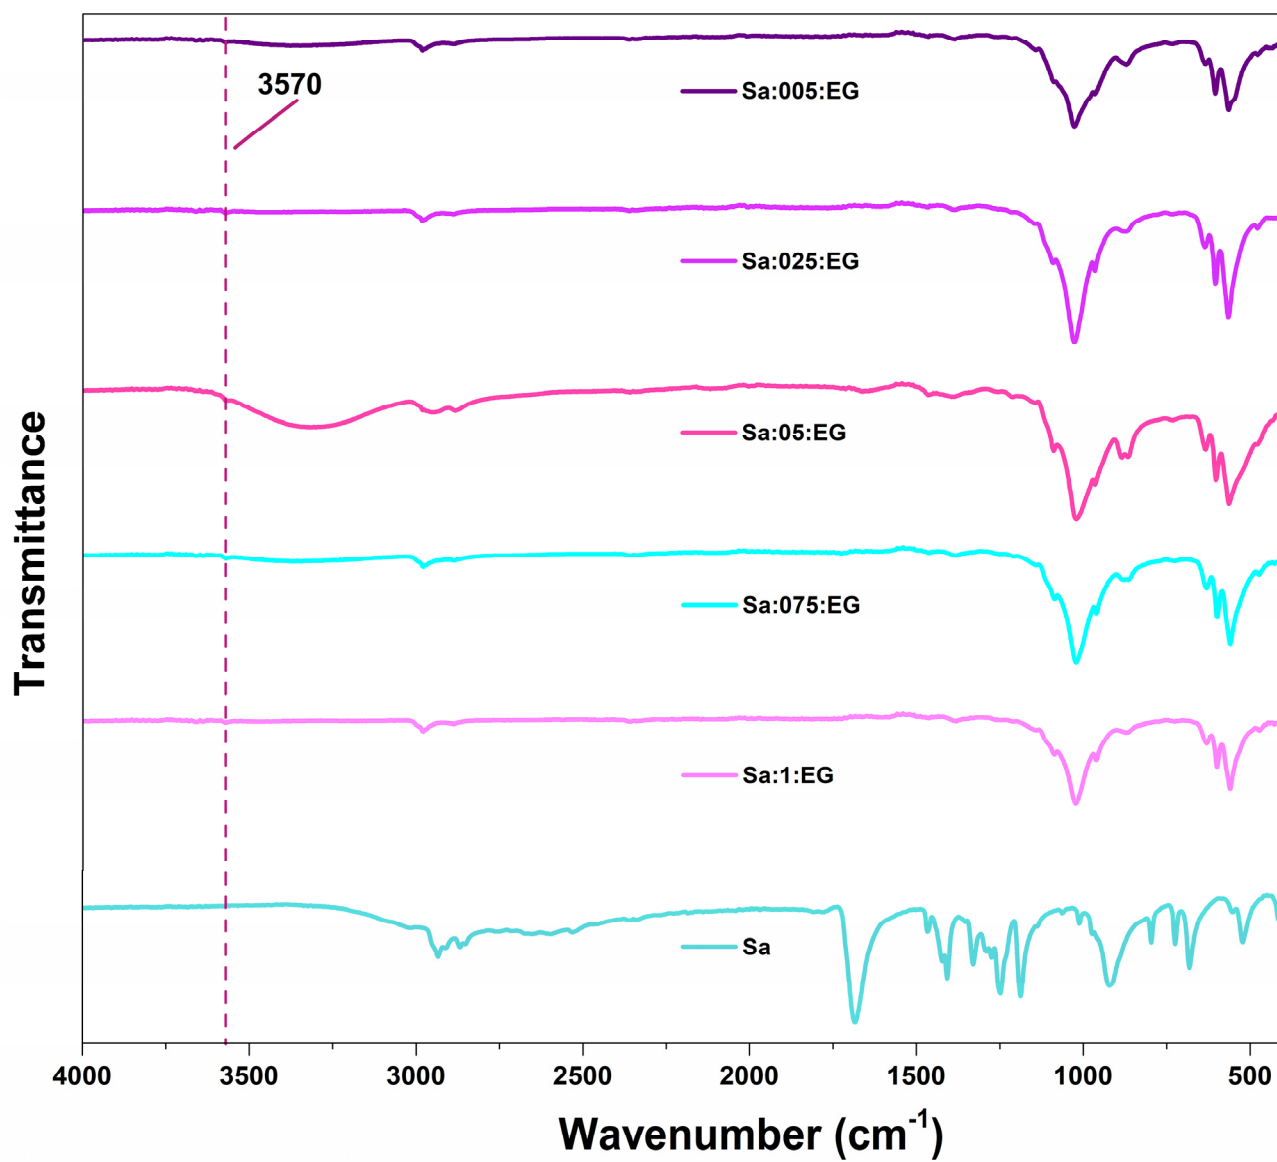

Figure S8. FTIR spectra of the samples prepared using various concentrations of suberic acid in water-ethylene glycol mixture (40:60, v/v).
