# Supplementary material for: Solvothermal Synthesis of Calcium Hydroxyapatite via Hydrolysis of Alpha-Tricalcium Phosphate in the Presence of Different Organic Additives
Source: MDPI journal article supplement (doi:10.3390/cryst13020265), 2023-02-03
Supplement: s1 [file s1]

Archive with 1 entries (1 files):
- crystals-2175988-supplementary.pdf
